# Supplementary material for: Origin and diversification of Xanthomonas citri subsp. citri pathotypes revealed by inclusive phylogenomic, dating, and biogeographic analyses
Source: PubMed Central journal article supplement (PMC6734499; doi:10.1186/s12864-019-6007-4), 2019-09-09
Supplement: 12864_2019_6007_MOESM4_ESM.pdf [file 12864_2019_6007_MOESM4_ESM.pdf]

# ML LCBs (A\*, A<sup>w</sup>, (A, A2))

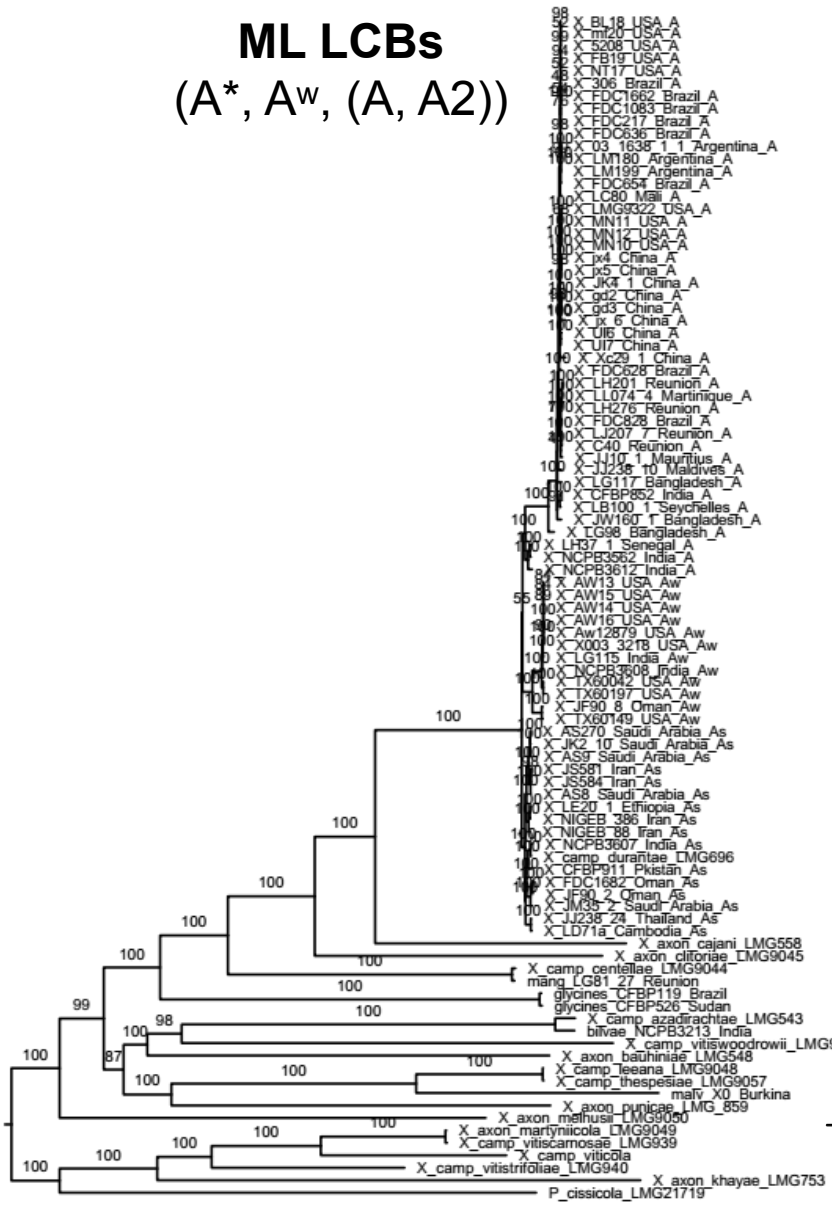

0.001

# ML LCBs (no rec) (A\*, (A, A<sup>w</sup>, A2))

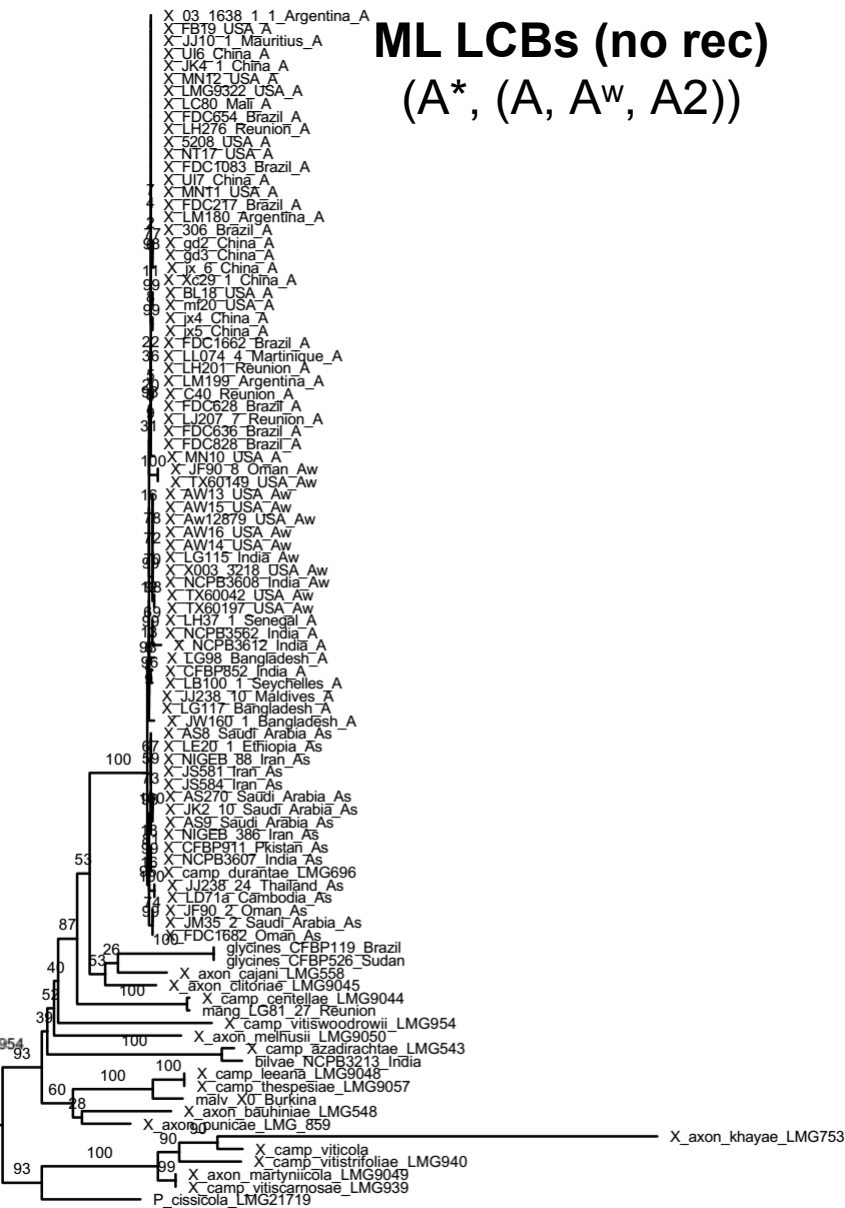

0.002

# Species Tree LCBs (A\*, A<sup>w</sup>, (A, A2))

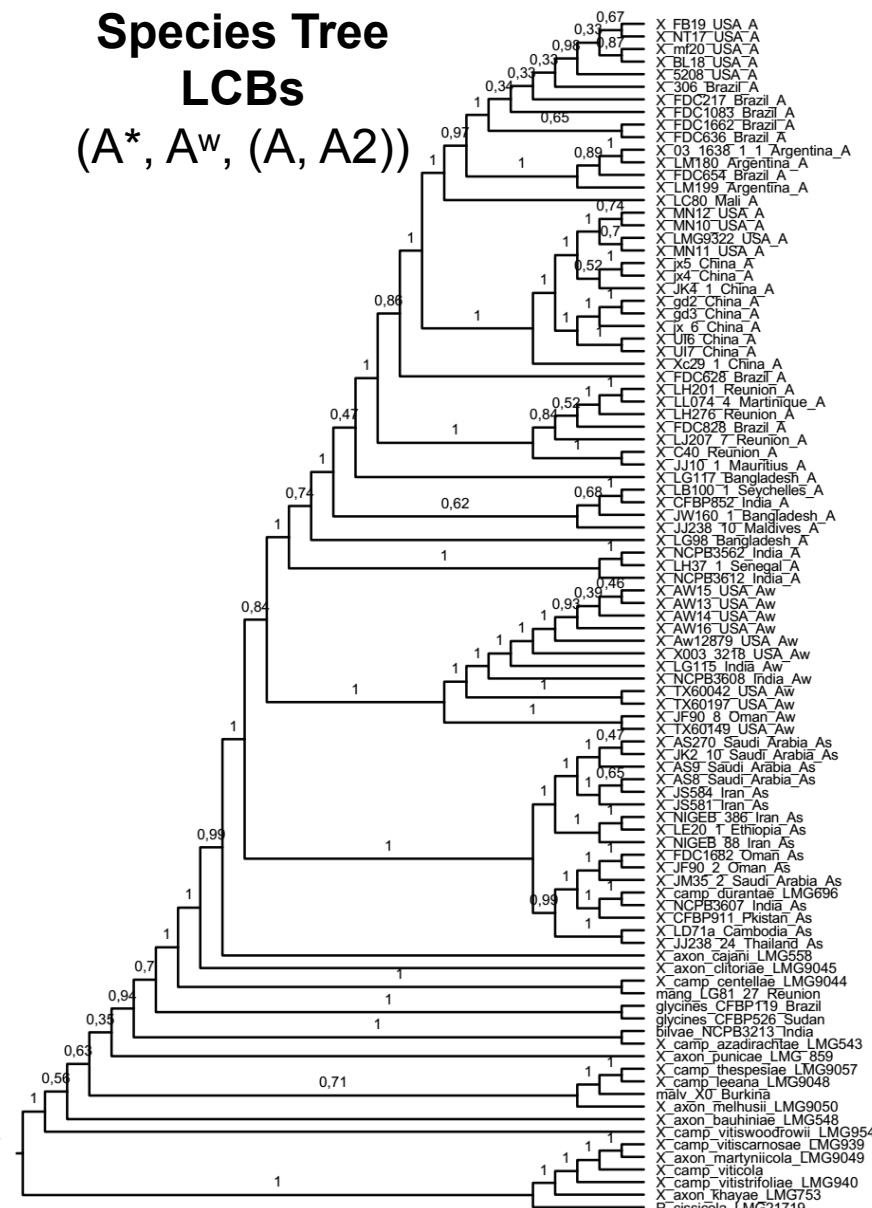

0.001

# ML Indels (A2, A\*, A<sup>w</sup>, A)

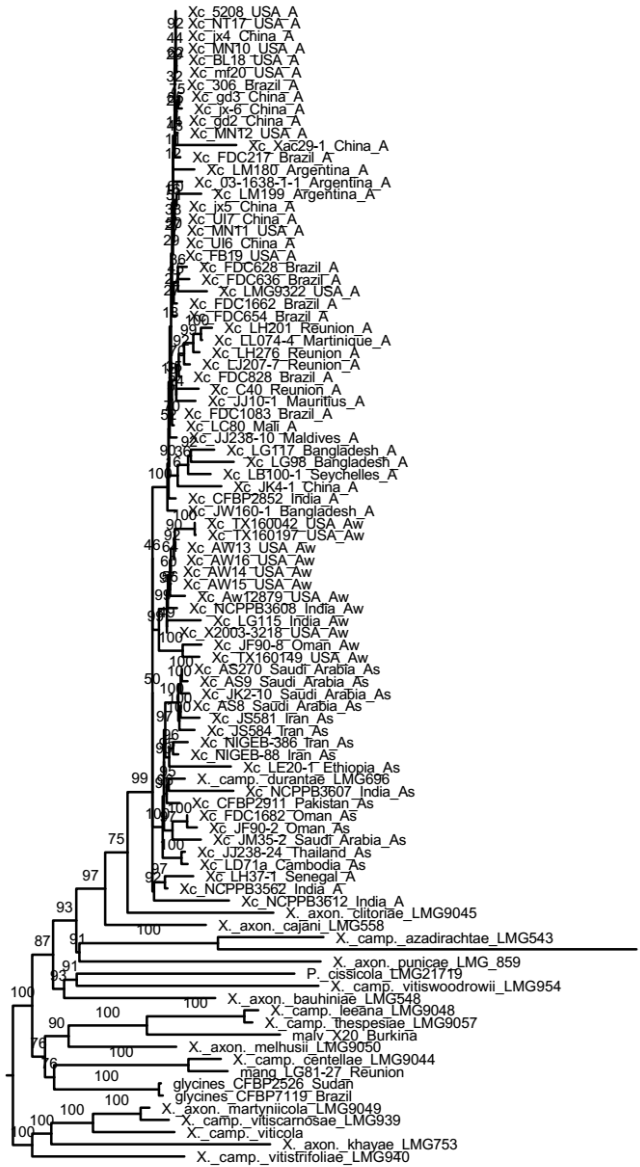

0.05

# Species Tree Unicopy (A\*, A<sup>w</sup>, A, A2)

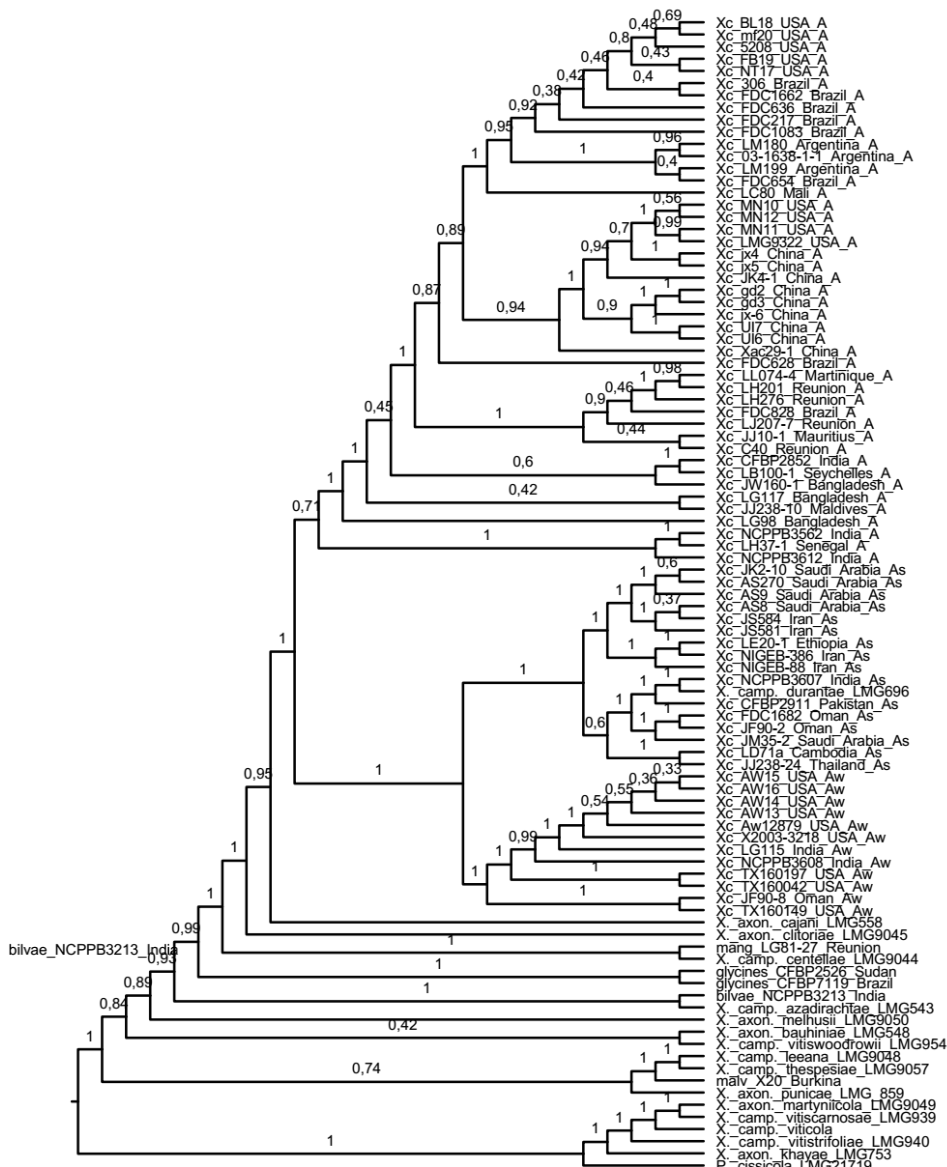

3.0

# MP Unicopy (A, (A\*, (A<sup>w</sup>, A2)))

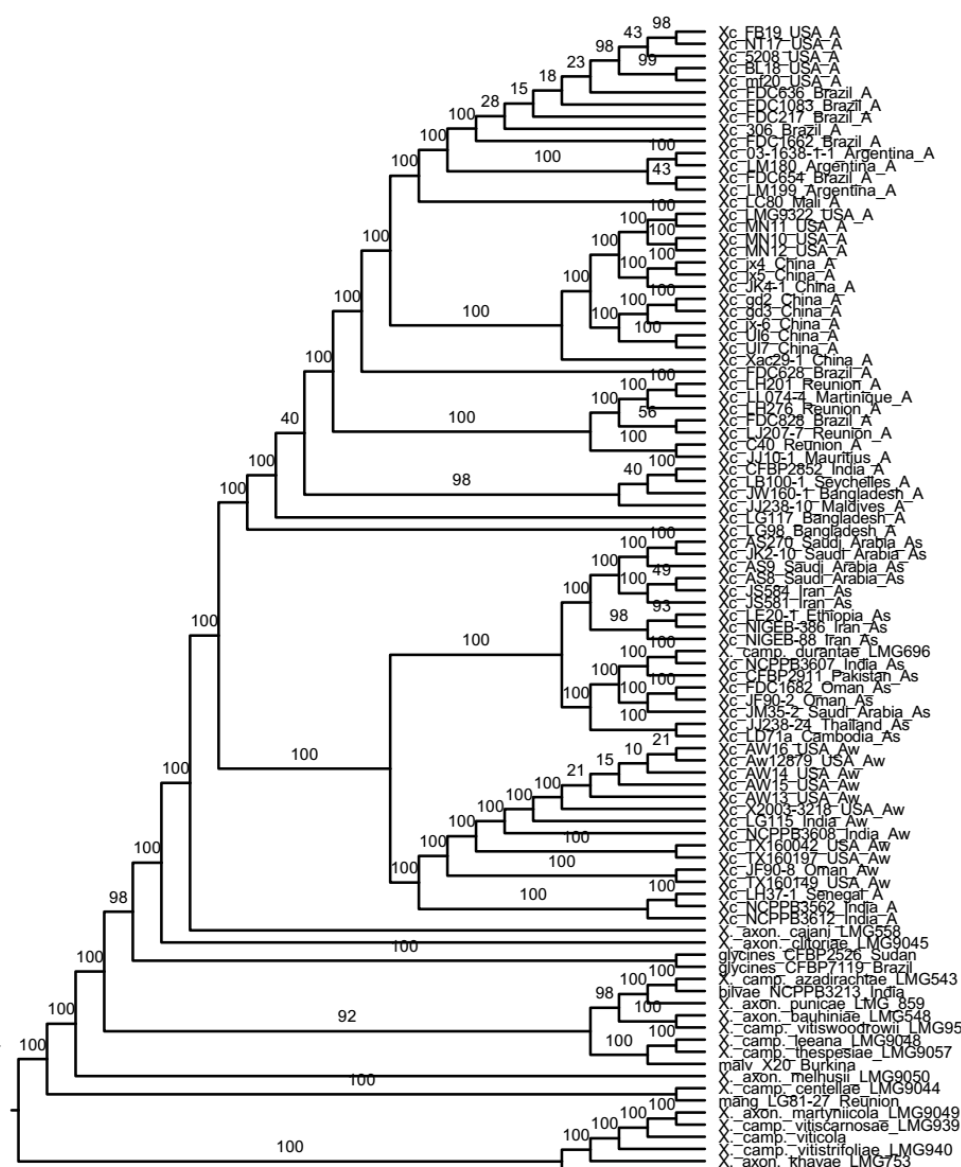

100
