# Supplementary material for: Origin and diversification of Xanthomonas citri subsp. citri pathotypes revealed by inclusive phylogenomic, dating, and biogeographic analyses
Source: PubMed Central journal article supplement (PMC6734499; doi:10.1186/s12864-019-6007-4), 2019-09-09

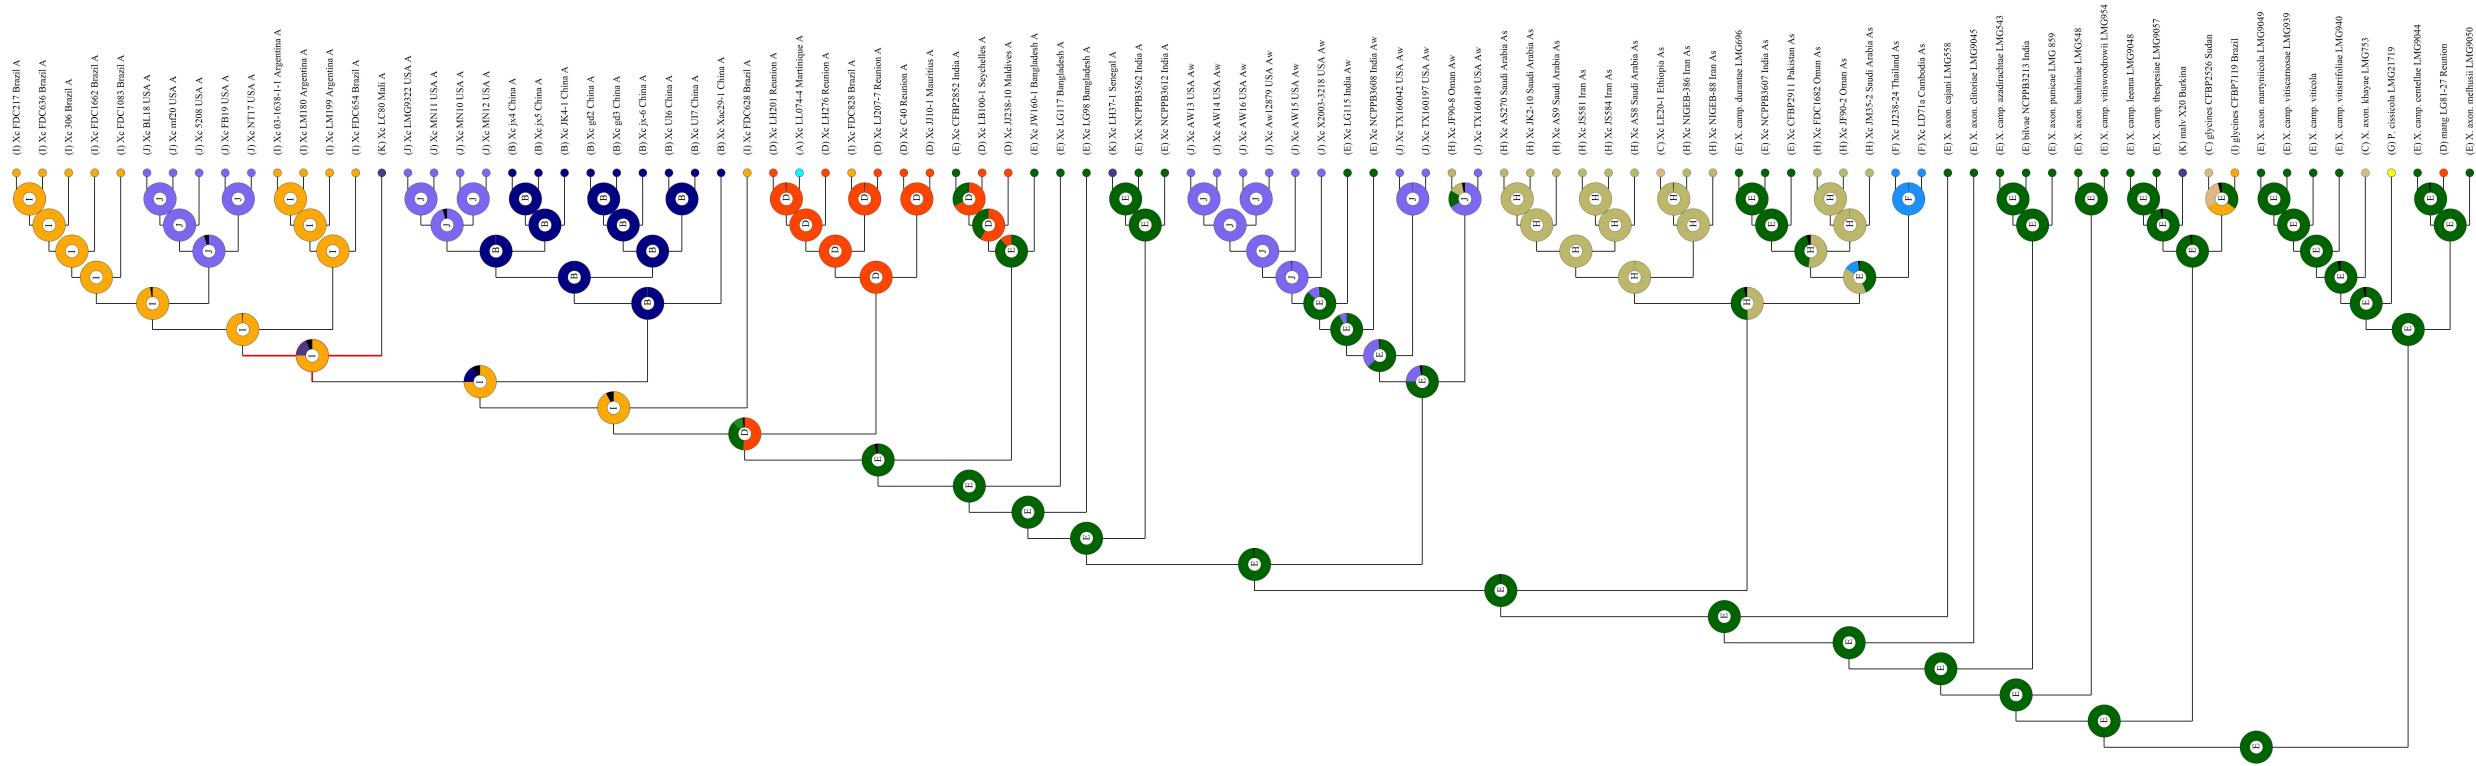

Supplement: 12864_2019_6007_MOESM5_ESM.pdf [file 12864_2019_6007_MOESM5_ESM.pdf]
